# Supplementary material for: A Pluridisciplinary Tracheostomy Weaning Protocol for Brain-Injured Patients, Outside of the Intensive Care Unit and Without Instrumental Assessment: Results of Pilot Study
Source: PubMed Central journal article supplement (PMC11239749; doi:10.1007/s00455-023-10641-7), 2023-12-07
Supplement: 455_2023_10641_MOESM2_ESM.pdf [file 455_2023_10641_MOESM2_ESM.pdf]

# Etude clinique DECATRAC

Code promoteur: CHUBX 2017/31  
Promoteur: CHU de Bordeaux

## Contacts

### Investigateur coordonnateur

**Thomas GALLICE** – masseur kinésithérapeute référent  
Service NEUROCHIRURGIE B  
Hôpital Pellegrin - CHU de Bordeaux  
☎ : 72 575  
[thomas.gallice@chu-bordeaux.fr](mailto:thomas.gallice@chu-bordeaux.fr)

### Co-investigateur

**Manuella BALAGUER** – masseur kinésithérapeute référent  
Service NEUROCHIRURGIE A  
Hôpital Pellegrin - CHU de Bordeaux  
☎ : 70 035  
[manuella.balaguer@chu-bordeaux.fr](mailto:manuella.balaguer@chu-bordeaux.fr)

### Infirmiers experts référents

**Julie GAUBE** ☎ : 95 574  
[julie.gaube@chu-bordeaux.fr](mailto:julie.gaube@chu-bordeaux.fr)

**Clément BARTHELEMY** ☎ : 21 211  
[clement.barthelemy@chu-bordeaux.fr](mailto:clement.barthelemy@chu-bordeaux.fr)

Service NEUROCHIRURGIE B  
Hôpital Pellegrin - CHU de Bordeaux

### Attachée de recherche clinique (ARC)

**Ouidad HASNAOUI - BEN KACEM**  
Service NEUROCHIRURGIE B  
Hôpital Pellegrin - CHU de Bordeaux  
☎ : 21 312 - Fax : 95 984  
[ouidad.hasnaoui@chu-bordeaux.fr](mailto:ouidad.hasnaoui@chu-bordeaux.fr)

## Protocole SEVRAGE + DECANNULATION

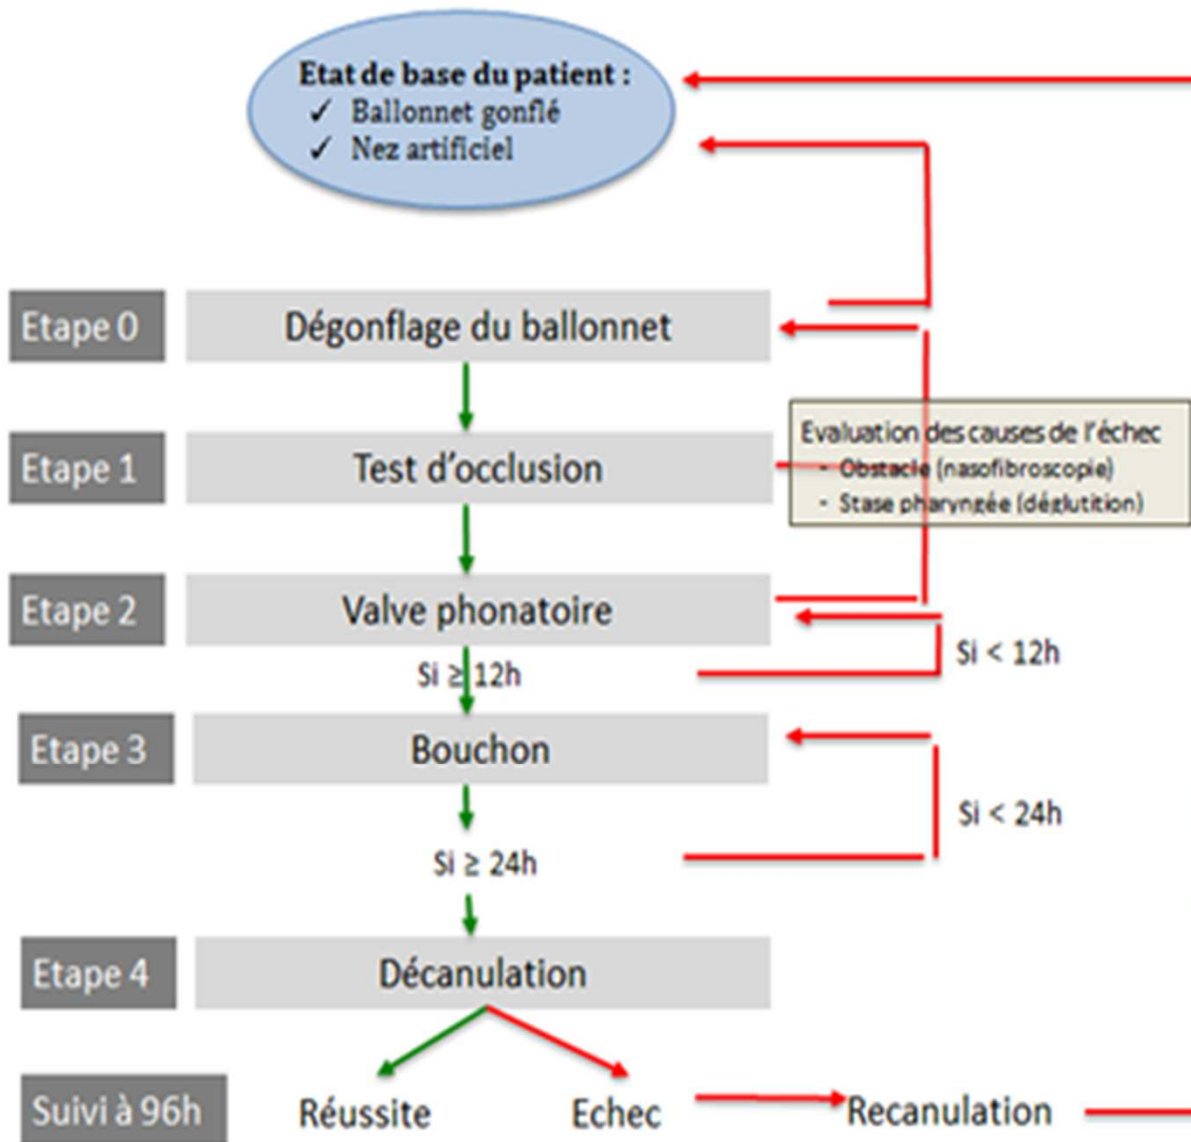

# Conduite à tenir

Lors de la procédure de sevrage, différents événements peuvent se présenter. Voici la liste des principaux événements et la prise en charge à assurer.

## Cas n°1 : Hyperthermie > 38,5°

**Arrêt du sevrage et voir la conduite à tenir avec le médecin**

## Cas n°2 : Vomissements → risque important d'inhalation

**Arrêt du sevrage : regonfler le ballonnet ET mettre le nez artificiel**

## Cas n°3 : Cornage ou stridor = bruit anormal lié au rétrécissement des voies aériennes, associé à une détresse respiratoire importante → agir immédiatement

**-> 2 cas :**

- 1) Sécrétions « bloquées » en fond de gorge ou sur le pourtour de la canule : utiliser l'aérosol de sérum physiologique et favoriser les efforts de toux → **doit permettre une amélioration immédiate**
- 2) Autre (ex: granulome, sténose trachéale) : normalement détectés aux étapes 0 - 1 (peu probable lorsque le sevrage en est déjà à l'étape 2 et 3) → **arrêt du sevrage** et réévaluation en équipe pluridisciplinaire de la suite de la prise charge.

## Cas n°4 : Dégradation modérée des critères de stabilité à type de désaturation et/ou dégradation de la clinique respiratoire (tirage), augmentation de la fréquence respiratoire, de la fréquence cardiaque ou de la tension artérielle

**-> Rechercher une cause**

- 1) Encombrement
  - nettoyer la canule (bouchon muqueux)
  - Broncho-aspiration (**attention encombrement « silencieux »** si antécédents de sécrétions très épaisses et collantes)

Ces deux manœuvres doivent permettre une **amélioration rapide**.

Dans un second temps : évaluer s'il y a une majoration de l'encombrement (**rappel : maximum 6 aspirations productives** abondantes ou très abondantes **sur 24 heures**).

- 2) Fatigue respiratoire liée au sevrage
  - évaluer un état d'anxiété ou d'agitation qui pourrait influencer négativement la clinique respiratoire
  - discuter soit de l'ajout d'oxygène (max 4L), soit du retour à une étape précédente en fonction de la tolérance et des capacités actuelles du patient. Doit permettre une **amélioration relativement rapide** (30 minutes max)
  - discuter en équipe pluridisciplinaire des causes
- 3) Dégradation de cause inconnue et autre que celles ci-dessus : **prévenir le médecin et discuter de l'arrêt du sevrage et de la conduite à tenir**.

## Cas n°5 : Encombrement important

**( > 6 aspirations abondantes et très abondantes par 24h)**

- Aspirer les sécrétions bronchiques
- Contacter le kinésithérapeute pour kinésithérapie respiratoire
- Effectuer un retour à l'état de base (ballonnet gonflé, nez artificiel)
- Puis discuter en équipe de :

- 1) **Evaluer la qualité et la quantité de l'encombrement pour évaluer la cause**
  - est-ce des fausses routes à la salive ?
  - une pneumopathie en cours d'installation ?
- 2) **Est-ce une mauvaise gestion par le patient de ses sécrétions salivaires (stases buccales, « bavage », ...)?**
  - discuter de la mise en place de Scopoderm®
- 3) **Y-a-t-il des facteurs majorant des troubles de la déglutition qui pourraient être corrigés ?**
  - reflux gastro-œsophagiens : privilégier la position assise au maximum (**rappel : +30° minimum** pour tout patient trachéotomisé), mise en place de traitement
  - sonde nasogastrique : discuter de la mise en place d'une gastrostomie
  - mycose buccale : mise en place de traitement

## Cas n°6: Auto-décanulation par le patient

- 1) Mettre le patient en position demi-assise avec le masque à oxygène à 6L
- 2) Donner l'alerte et faire appeler le médecin et le kiné en urgence
- 3) Surveiller en continu les constantes vitales, la saturation et la clinique respiratoire
- 4) En cas de détresse respiratoire aigüe : utiliser l'écarteur de Laborde qui se trouve dans le chariot d'urgence, augmenter le débit d'oxygène
- 5) Si le patient est stable, attendre l'arrivée du médecin qui doit être très rapide
- 6) En attendant l'arrivée du médecin, s'assurer qu'une canule de rechange de même modèle et de même diamètre soit prête à l'emploi

## Cas n°7 : Décanulation programmée

Prévoir le matériel suivant:

- Masque à oxygène et débitmètre à oxygène
- Chariot d'urgence qui comprend BAVU et pince de Laborde
- Matériel de recanulation avec trachéotomie de même modèle et de même diamètre
